# Supplementary material for: Porcine Epidemic Diarrhea Virus among Farmed Pigs, Ukraine
Source: PubMed Central journal article supplement (PMC4672447; doi:10.3201/eid2112.150272), 2015-12
Supplement: 15-0272-Techapp-s1.pdf [file 15-0272-Techapp-s1.pdf]

# Porcine Epidemic Diarrhea Virus among Farmed Pigs, Ukraine

## Technical Appendix

### **Porcine Epidemic Diarrhea Outbreaks in the Americas, 2014**

Porcine epidemic diarrhea virus outbreaks were reported in Columbia, the Dominican Republic, and Ecuador during 2014. See the following ProMED articles (<http://www.promedmail.org/>): Columbia, archive nos. 20140319.2341300 and 20140611.2532426; Dominican Republic, archive no. 20140616.2544899; Ecuador, archive no. 20140910.2763771.
